# Supplementary material for: Functional Characterization of Two Structurally Novel Diacylglycerol Acyltransferase2 Isozymes Responsible for the Enhanced Production of Stearate-Rich Storage Lipid in Candida tropicalis SY005
Source: PLOS journal article supplement (doi:10.1371/journal.pone.0094472), 2014-04-14
Supplement: S6 (10.1371/journal.pone.0094472.s006) [file journal.pone.0094472.s006]

**Table S1. Putative functional motifs of two CtDGAT2 isoforms predicted by PROSCAN.**

| **Functional site** | **CtDGAT2a** | |  | **CtDGAT2b** | |  |
| --- | --- | --- | --- | --- | --- | --- |
|  | **Position** | **Amino acid** | | **Position** | **Amino acid** | |
| N-glycosylation site | 211-214 | NDTA | | 211 to 214 | NDTA | |
| Protein kinase C phosphorylation site | 51 to 53  55 to 57  76 to 78  140 to 142  272 to 274  ------------  312 to 314  383 to 385  451 to 453  526 to 528 | TVK  TPR  SHR  SFK  SSK  -----  SAR  SKR  SAR  SIK | | 51 to 53  55 to 57  76 to 78  140 to 142  272 to 274  275 to 277  312 to 314  383 to 385  451 to 453  526 to 528 | TVR  TPR  SHR  SFK  SSK  SER  SAR  SKR  SAR  SIK | |
| Casein kinase II phosphorylation site | 11 to 14  13 to 16  17 to 20  167 to 170  179 to 182  180 to 183  195 to 198  273 to 276  364 to 367  376 to 379  383 to 386  510 to 513 | TSTE  TELE  TNVD  TFSE  SSDD  SDDD  TKVD  SKGE  SEEE  SKLD  SKRE  SITD | | 11 to 14  13 to 16  17 to 20  167 to 170  179 to 182  180 to 183  195 to 198  273 to 276  364 to 367  378 to 381  385 to 388  512 to 515 | TSTE  TELE  TNFD  TFSE  SSDD  SDDD  TKVD  SKSE  SEEE  SKLD  SKRE  SITD | |
| N-myristoylation site | 26 to 31  246 to 251  307 to 312  333 to 338 | GTFESE  GLFANN  GITSAS  GAQESL | | 26 to 31  246 to 251  307 to 312  333 to 338 | GTFESE  GLFANN  GITSAS  GAQESL | |
| Amidation site | 58 to 61 | NGKK | | 58 to 61 | NGKK | |
